# Supplementary material
Source: Research Square preprint supplement (doi:10.21203/rs.3.rs-8968320/v1)
Supplement: Supplementary file 1 [file 3250f5b74844d48ee3d19b83.docx]

Supplementary Material

#### Supplementary Figure 1 Subset analysis gene expression liver

####

#### Supplementary Figure 2 Subgroup analysis gene expression liver


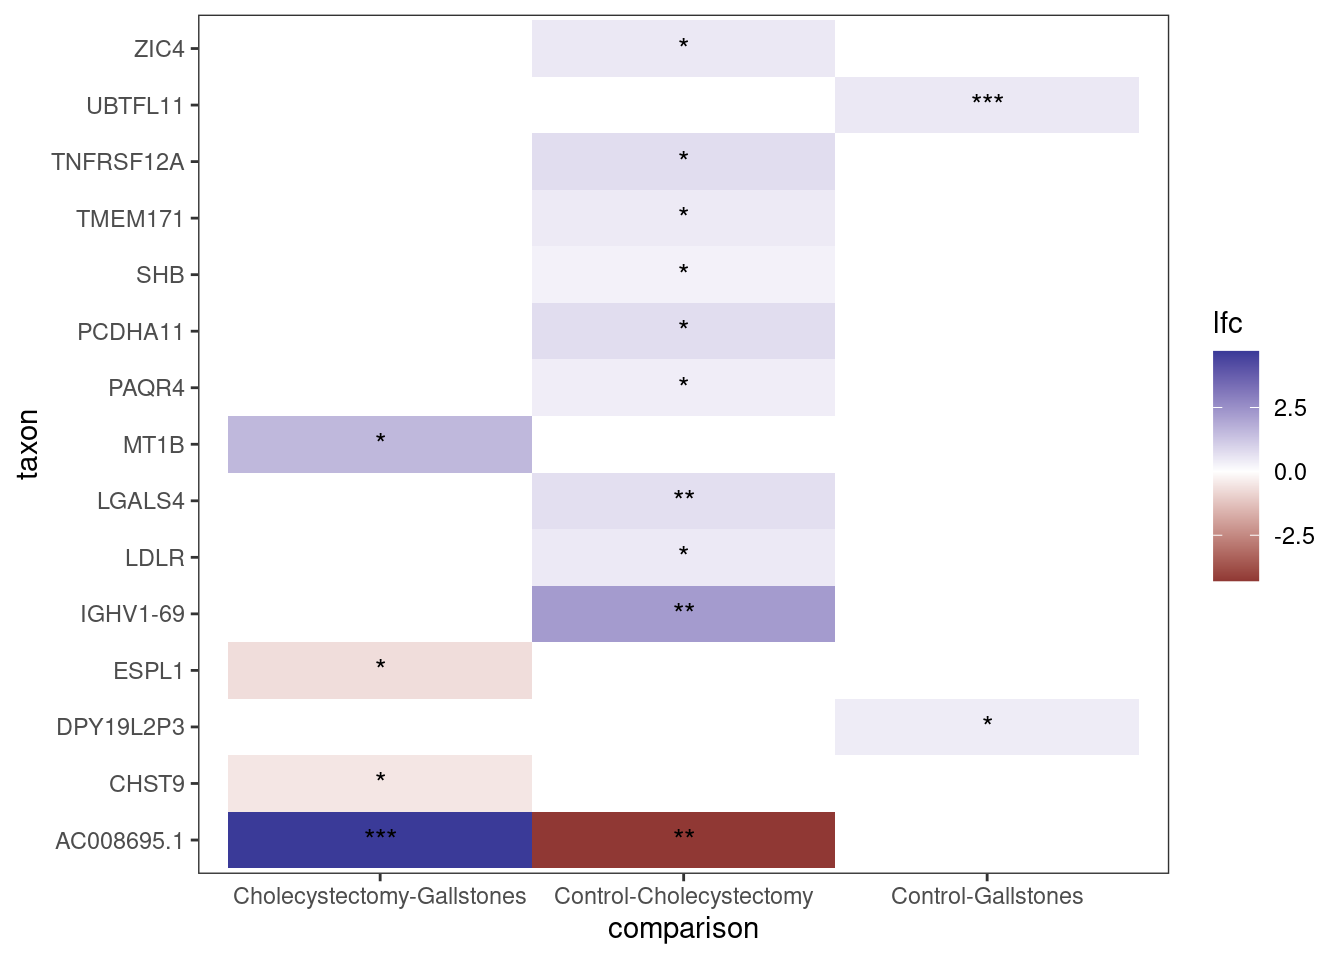


#### Supplementary Figure 3 Gene expression visceral adipose tissue

#### 
