# Supplementary material
Source: Research Square preprint supplement (doi:10.21203/rs.3.rs-8968320/v1)
Supplement: Supplementary file 2 [file a3ba9082a65df373d670002c.xlsx]

## Sheet: Table 1 Baseline
Table 1. Baseline characteristics
	Total population	Controls	Gallstone patients
N	108	69	39
Age (mean (SD))	45.33 (10.56)	43.35 (10.81)	48.85 (9.23)
Start weight (kg) (mean (SD))	116.56 (13.76)	116.86 (13.64)	116.03 (14.12)
BMI (kg/m2) (mean (SD))	39.62 (4.17)	39.34 (4.07)	40.12 (4.36)
Start obesity (%)
Child	40 ( 37.0)	28 ( 40.6)	12 ( 30.8)
Puberty	26 ( 24.1)	18 ( 26.1)	8 ( 20.5)
Adult	42 ( 38.9)	23 ( 33.3)	19 ( 48.7)
Medication use (%)	89 ( 82.4)	58 ( 84.1)	31 ( 79.5)
Oral anticonceptives (%)	33 ( 30.6)	23 ( 33.3)	10 ( 25.6)
Statin (%)	17 ( 15.7)	10 ( 14.5)	7 ( 17.9)
H. pylori treatment (%)	14 ( 13.0)	7 ( 10.1)	7 ( 17.9)
Antibiotic use (%)	13 ( 12.0)	6 ( 8.7)	7 ( 17.9)
Primary lipid disease (%)	2 ( 1.9)	1 ( 1.4)	1 ( 2.6)
Cholecystectomy (%)	22 ( 20.4)	1 ( 1.4)	21 ( 53.8)
Type 1 diabetes (%)	2 ( 1.9)	0 ( 0.0)	2 ( 5.1)
Type 2 diabetes (%)	8 ( 7.4)	6 ( 8.7)	2 ( 5.1)
Hypertension (%)	42 ( 38.9)	23 ( 33.3)	19 ( 48.7)
Dyslipidemia (%)	15 ( 13.9)	6 ( 8.7)	9 ( 23.1)
Alcohol use (%)	36 ( 33.3)	24 ( 34.8)	12 ( 30.8)
Alcohol units (mean (SD))	2.34 (3.67)	2.53 (4.31)	1.96 (1.92)
Smoking (%)
Yes	6 ( 5.6)	3 ( 4.3)	3 ( 7.7)
No	56 ( 51.9)	33 ( 47.8)	23 ( 59.0)
Quit	46 ( 42.6)	33 ( 47.8)	13 ( 33.3)
Packyears (mean (SD))	5.74 (7.20)	10.65 (7.53)	0.83 (0.68)
eGFR-MDRD (median [IQR])	90.00 [84.75, 91.00]	91.00 [87.00, 91.00]	89.00 [78.50, 91.00]
Bilirubin, total (µmol/L) (median [IQR])	7.00 [5.00, 10.00]	7.00 [5.00, 9.00]	7.00 [5.00, 10.50]
ALP (U/L) (median [IQR])	85.00 [71.50, 95.25]	83.00 [67.00, 96.00]	85.00 [76.00, 93.00]
GGT (U/L) (median [IQR])	29.00 [21.75, 40.50]	28.00 [21.00, 40.00]	31.00 [24.00, 41.50]
AST (U/L) (median [IQR])	24.00 [20.00, 28.00]	24.00 [20.00, 28.00]	24.00 [20.00, 28.00]
ALT (U/L) (median [IQR])	31.00 [25.00, 39.25]	32.00 [25.00, 40.00]	31.00 [25.00, 37.00]
Cholesterol, total (mmol/L) (median [IQR])	5.10 [4.40, 5.62]	4.90 [4.30, 5.50]	5.20 [4.45, 5.65]
LDL cholesterol (mmol/L) (median [IQR])	3.40 [2.70, 3.90]	3.40 [2.80, 3.90]	3.50 [2.46, 3.90]
HDL cholesterol (mmol/L) (median [IQR])	1.30 [1.10, 1.50]	1.30 [1.10, 1.50]	1.20 [1.10, 1.50]
Triglycerides (mmol/L) (median [IQR])	1.20 [1.00, 1.98]	1.20 [1.00, 1.80]	1.40 [1.05, 2.55]
HbA1c (%) (median [IQR])	5.40 [5.10, 6.23]	5.40 [5.10, 6.30]	5.50 [5.20, 6.15]
Nominal variables with mean (SD), mean with standard deviation.
Categorical variables with N and percentage
Lab results in median with interquartile range [IQR]
ALP Alkaline phosphatase; GGT gamma-glutamyl transferase; AST aspartate aminotransferase; ALT alanine aminotransferase; HbA1c % according to NGSP.
U/L unit per liter; mmol/L millimol per liter; µmol/L micromol per liter
