# Supplementary material
Source: Research Square preprint supplement (doi:10.21203/rs.3.rs-8968320/v1)
Supplement: Supplementary file 3 [file c8c6e4f3bb7f25a6165ac114.xlsx]

## Sheet: Table 2 
Table 2. Selection significant genes visceral adipose tissue
Gene	Protein	Function
SCUBE1 (LFC 1.0) **	Surface glycoprotein	Member of the SCUBE (signal peptide, CUB domain, EGF (epidermal growth factor)-like protein) family. This protein is expressed in platelets and endothelial cells, may play an important role in vascular biology and extracellular matrix organization.
CA3 (LFC-1.0) *	Carbonic anhydrase 3	Associated with liver adipogenesis, even in pre‐obesity. CA3-inhibitors reduce liver adipose accumulation.
NRP2 (LFC 0.2) **	Neuropilin-2	Cardiovascular development, axon guidance, and tumorigenesis.
NPR3 (LFC 0.4) **	Nutriuretic peptide 3 receptor	Regulate cardiovascular function as well as some metabolic and growth processes. The product of this gene encodes a natriuretic peptide receptor responsible for clearing circulating and extracellular natriuretic peptides through endocytosis of the receptor.
ALDH4A1 (LFC 0.2) **	Aldehyde Dehydrogenase 4 Family Member A1	Mitochondrial matrix NAD-dependent dehydrogenase which catalyzes the second step of the proline degradation pathway, converting pyrroline-5-carboxylate to glutamate. Associated with atherosclerosis in mice.
* between(q, 0.01, 0.05) ; ** between(q, 0.001, 0.01); *** between(q, 0.0001, 0.001)
